# Supplementary material for: Preclinical Application of Reduced Manipulated Processing Strategy to Collect Transplantable Hepatocytes: A Pilot and Feasibility Study
Source: MDPI journal article supplement (doi:10.3390/jpm11050326), 2021-04-21

**Figure S1.** Collagenase digestion of partial porcine liver. (A) Under collagenase perfusion through catheter into a portal vein branch. (B) 30 min after perfusion. The cell viability of hepatocytes was 91%.

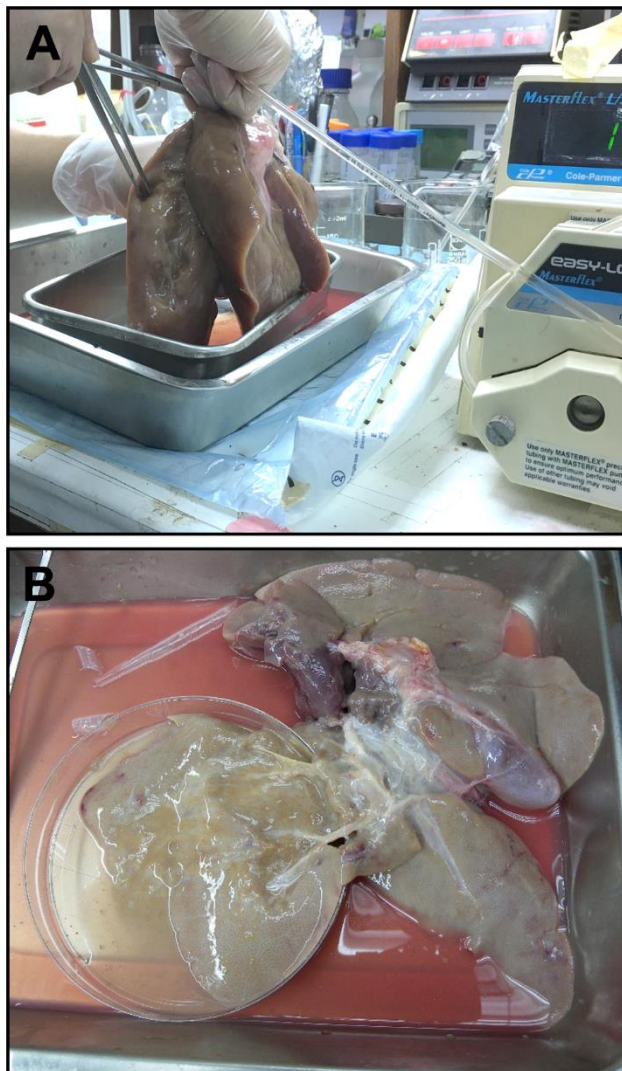

**Figure S2.** Cholangiocytes (marked by CK-19) and sinusoidal endothelial cells (marked by SE-1) in cellular products immediately after isolation of rat livers. Scale bar: 100  $\mu$ m.

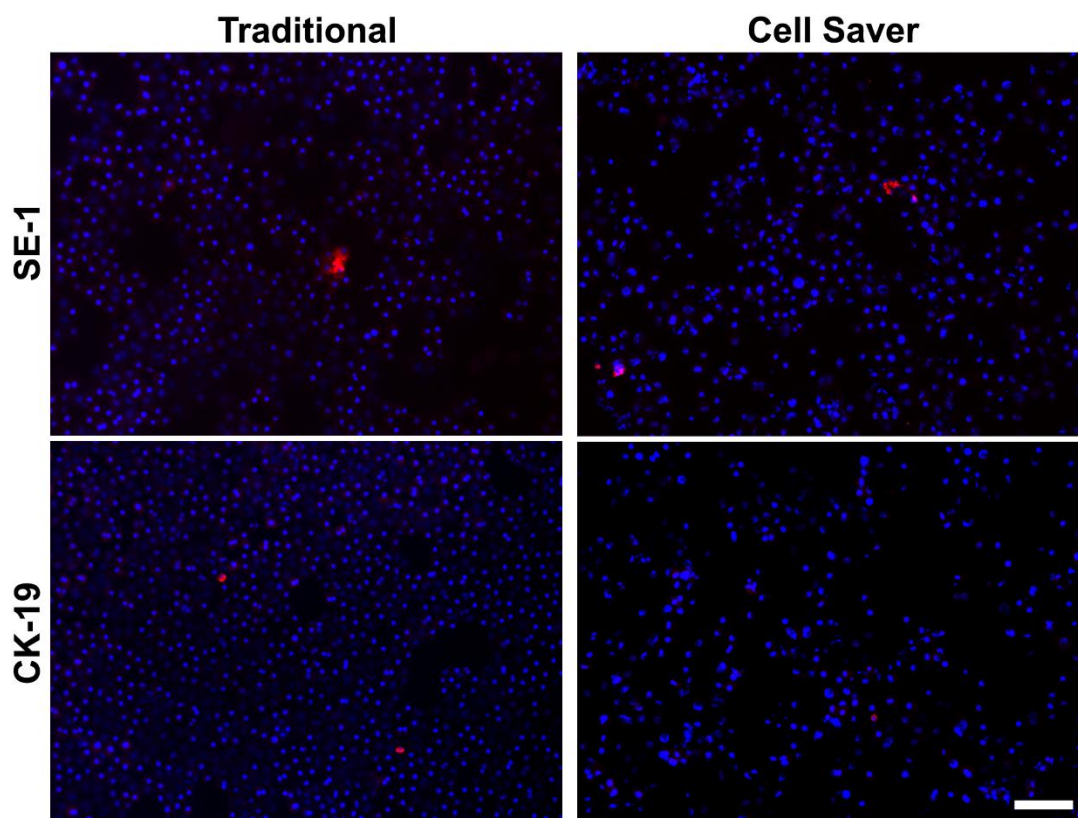

**Figure S3.** Isolated porcine hepatocytes obtained using the traditional method were confirmed based on albumin and cytochrome P450 3A4 (CYP3A4) expression. Scale bar: 100  $\mu$ m.

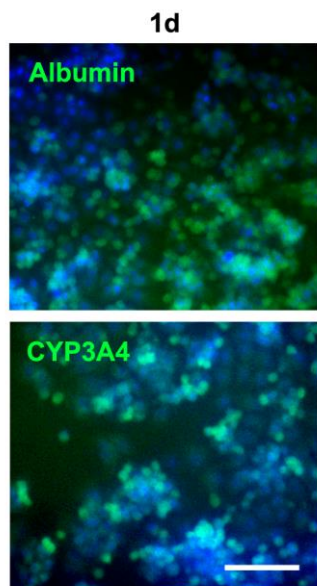

**Figure S4.** Experimental design for hepatocyte transplantation.

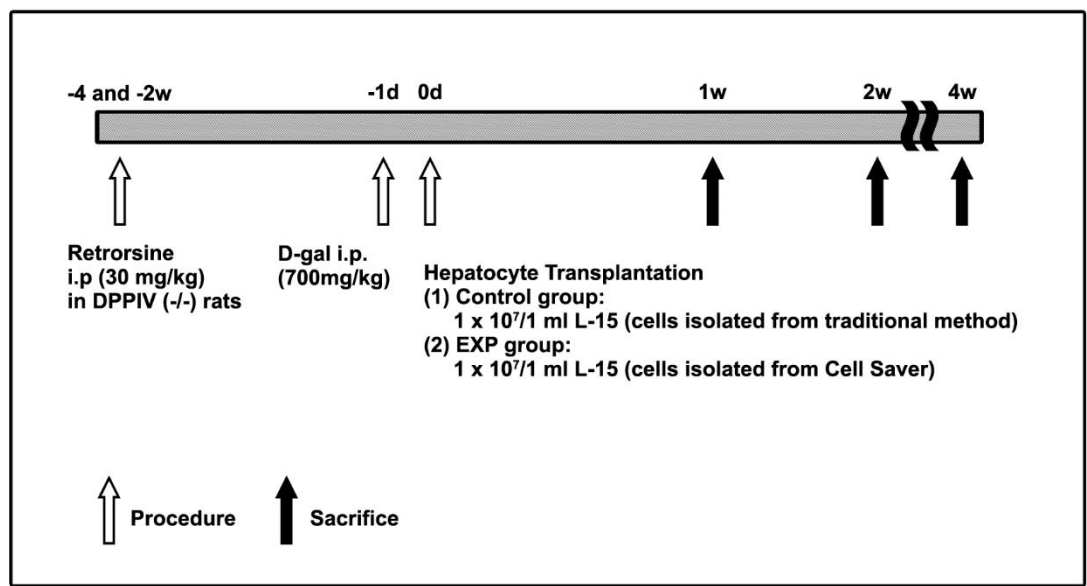

Supplement: s1 [file s1]
